# Supplementary material for: Acidic Ionic Liquid Anchored on PEG-Decorated Fe3O4 Nanoparticles: A Novel Heterogeneous and Magnetically Recoverable Organic-Inorganic Catalyst for the Efficient Synthesis of Pyrimidine DerivativesRunning head: Magnetic nanohybrid acidic catalyst
Source: Research Square preprint supplement (doi:10.21203/rs.3.rs-6793365/v1), 2025-06-12
Supplement: Supplementary file 1 [file 23674689778020218adf31ef.docx]

**Graphical Abstract**
